# Supplementary material
Source: Royal Society of Chemistry journal article supplement (doi:10.1039/d6qi00106h)
Supplement: d6qi00106h1.pdf [file d6qi00106h1.pdf]

1  
2  
3  
4  
5  
6  
7  
8  
9  
10  
11  
12  
13  
14  
15  
16  
17  
18  
19  
20  
21  
22  
23  
24  
25  
26

## Supporting Information

### Ultrasensitive Room-Temperature H<sub>2</sub>S Sensing Enabled by Interfacial Engineering via Bi-Shared Bi<sub>2</sub>S<sub>3</sub>/BiOI Heterostructures

Zhenze Zhou<sup>a</sup>, Dianpeng Qi<sup>a\*</sup>, Hui Zhang<sup>b</sup>, Ming Zhu<sup>c\*</sup>, Dan Shi<sup>d</sup>, Meiling Yu<sup>c</sup>,  
Haixin Lei<sup>c</sup>, Juanyuan Hao<sup>c\*</sup>

<sup>a</sup> School of Chemistry and Chemical Engineering, Harbin Institute of Technology,  
Harbin 150001, China.

<sup>b</sup> School of Chemistry and Materials Science, Hubei Engineering University,  
Xiaogan, 432000, China.

<sup>c</sup> School of Materials Science and Engineering, Harbin Institute of Technology, Harbin  
150001, China.

<sup>d</sup> State Key Laboratory of Efficient and Clean Coal-fired Utility Boilers, Harbin Boiler  
Company Limited, Harbin 150046, China.

\* Corresponding authors.

E-mail addresses: jyhao@hit.edu.cn (Juanyuan Hao\*), dpqi@hit.edu.cn (Dianpeng  
Qi\*), zhumingmilly@163.com (Ming Zhu\*), zhou1996\_edu@126.com (Zhenze  
Zhou), zhanghuiwxf@163.com (Hui Zhang), 18545653786@163.com (Dan Shi),  
23B909005@stu.hit.edu.cn (Meiling Yu), 24S009009@stu.hit.edu.cn (Haixin Lei).

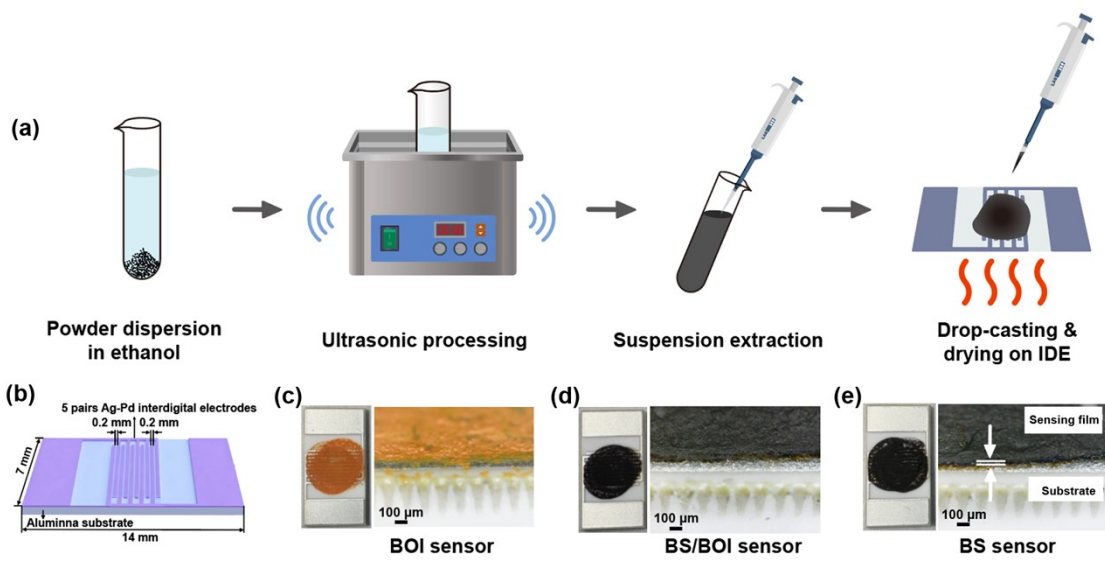

27  
 28 Fig. S1. (a) Schematic illustration of the sensor fabrication process. (b) Structural  
 29 diagram and dimensions of the IDE substrate. (c–e) Optical images and corresponding  
 30 cross-sectional views of the BOI, BS/BOI, and BS sensing films deposited on the IDE  
 31 substrate.

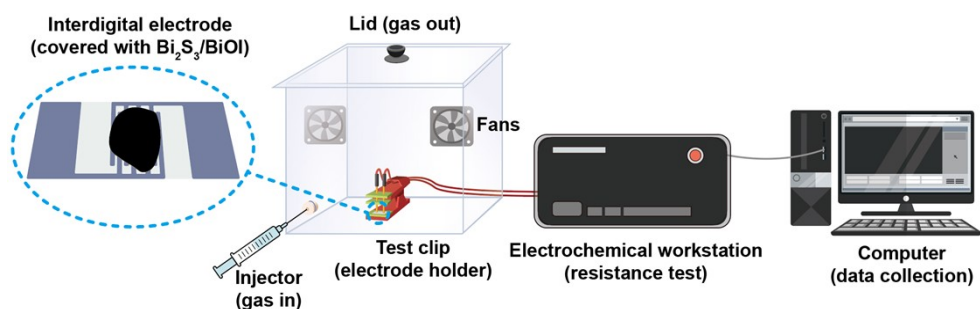

32  
 33 Fig. S2. Gas sensing test system schematic.

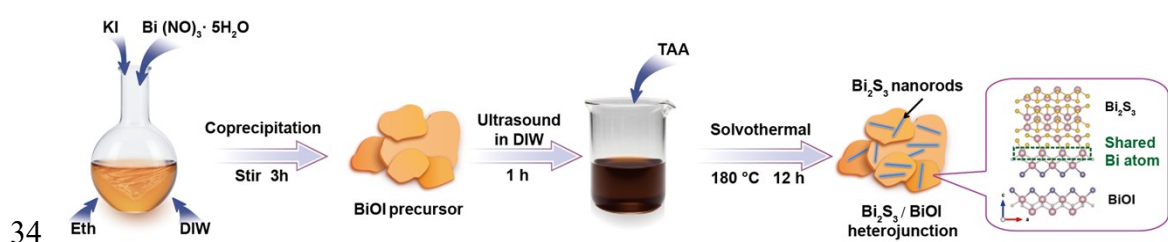

34  
 35 Fig. S3. Schematic illustration for the synthesis procedure of the  $\text{Bi}_2\text{S}_3/\text{BiOI}$   
 36 heterostructures.

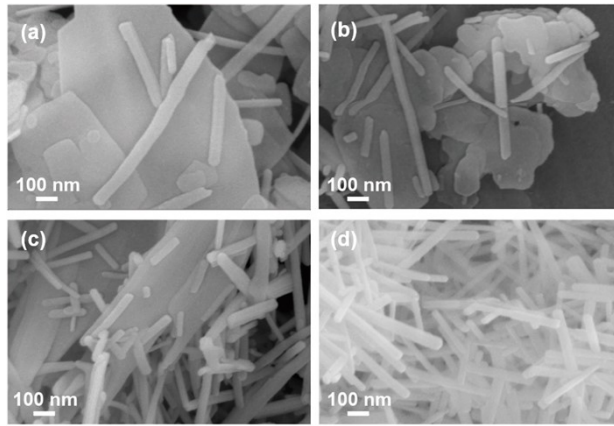

37

38 Fig. S4 SEM images of (a) BS/BOI-1, (b) BS/BOI-2, (c) BS/BOI-3 and (d) BS.

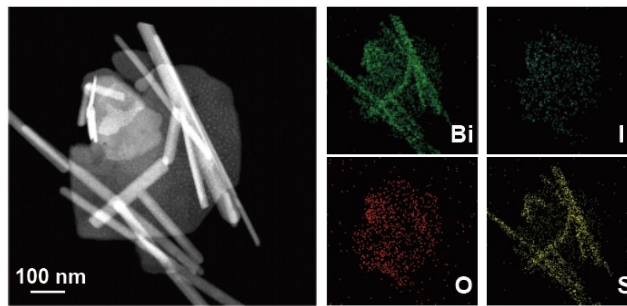

39

40 Fig. S5. EDX elemental mapping images of the  $\text{Bi}_2\text{S}_3/\text{BiOI}$  heterostructures.

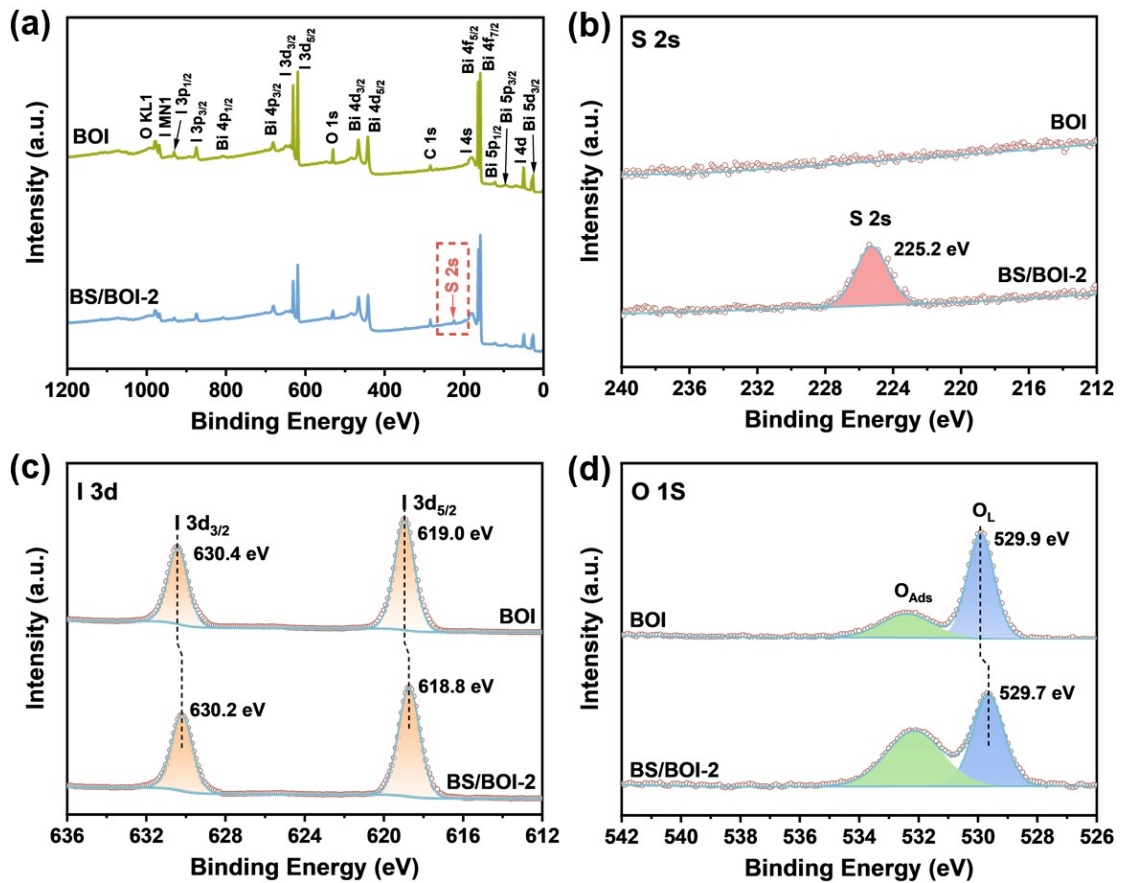

41

42 Fig. S6. XPS survey spectrum (a) and High-resolution XPS spectra of (b) S 2s, (c) I 3d,  
 43 and (d) O 1s for BOI and BS/BOI-2.

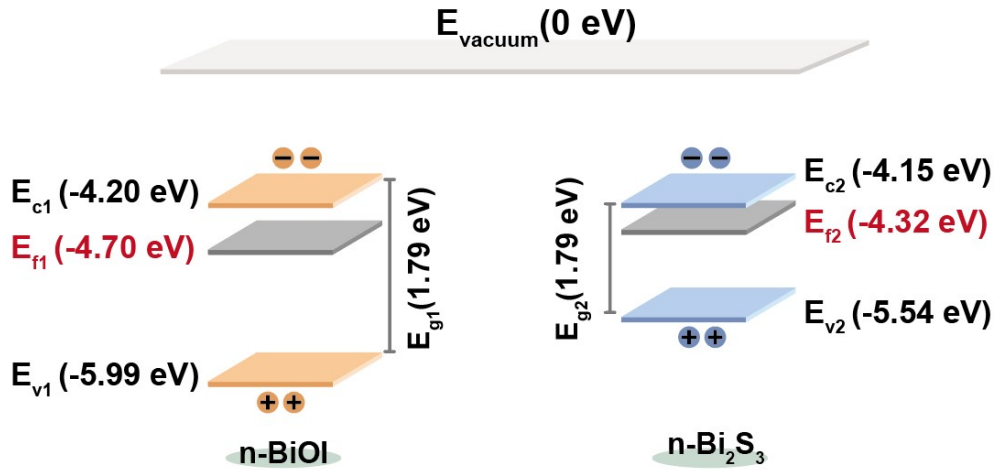

44  
 45 Fig. S7. Schematic band structures of BiOI and Bi<sub>2</sub>S<sub>3</sub>.

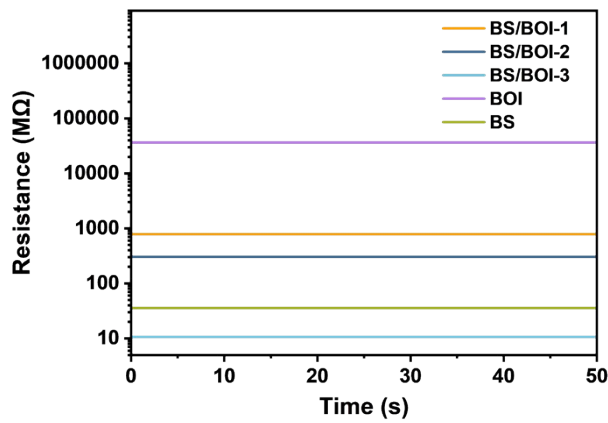

46  
 47 Fig. S8. Baseline resistance of BOI, BS/BOI-1, BS/BOI-2, BS/BOI-3 and BS sensors.

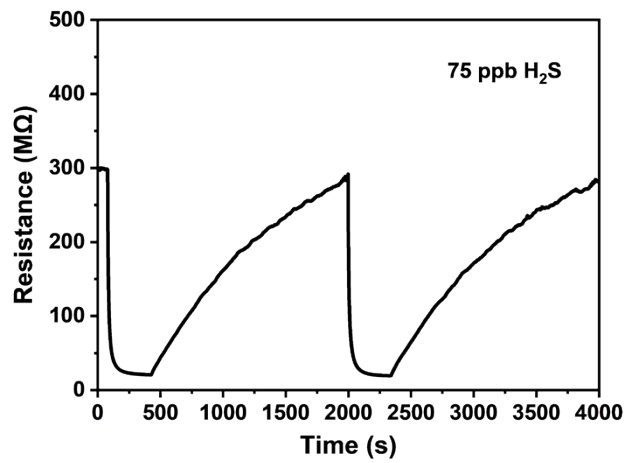

48  
 49 Fig. S9. Resistance test curves of the BS/BOI-2 sensor exposed to 75 ppb H<sub>2</sub>S.

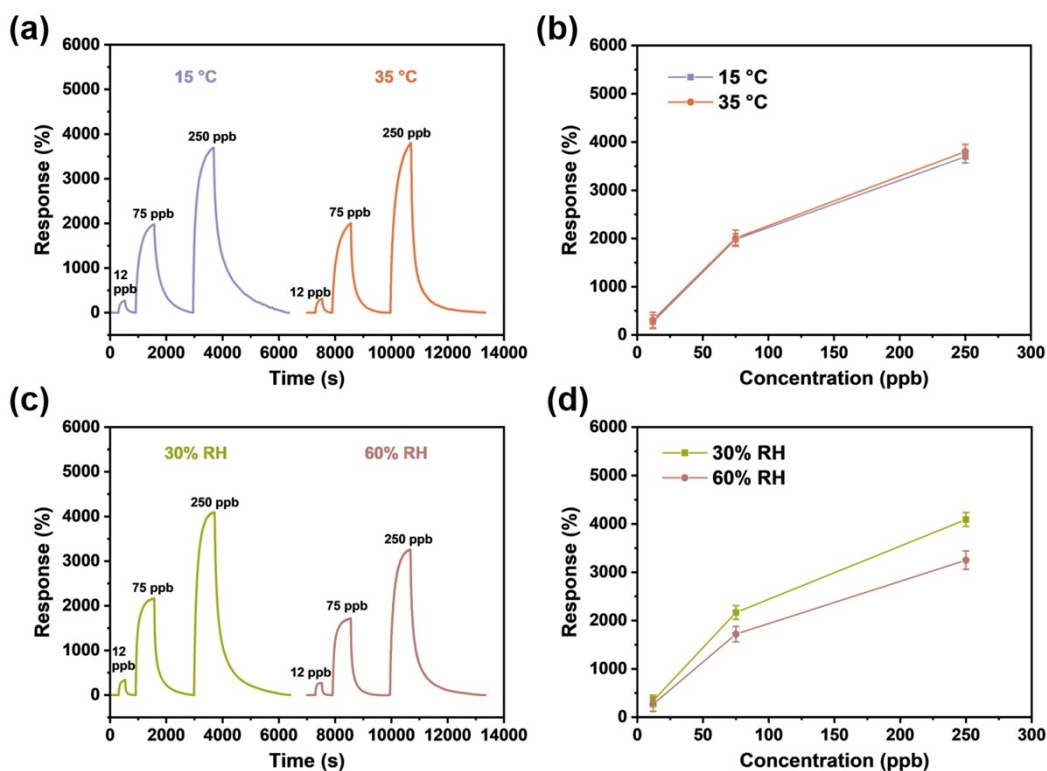

50

51 Fig. S10. Influence of temperature and humidity on the H<sub>2</sub>S sensing performance. (a)  
 52 Dynamic response curves at 15 and 35 °C. (b) Corresponding calibration curves under  
 53 different temperature conditions. (c) Dynamic response curves at different H<sub>2</sub>S  
 54 concentrations under 30% RH and 60% RH. (d) Corresponding calibration curves under  
 55 different humidity conditions.

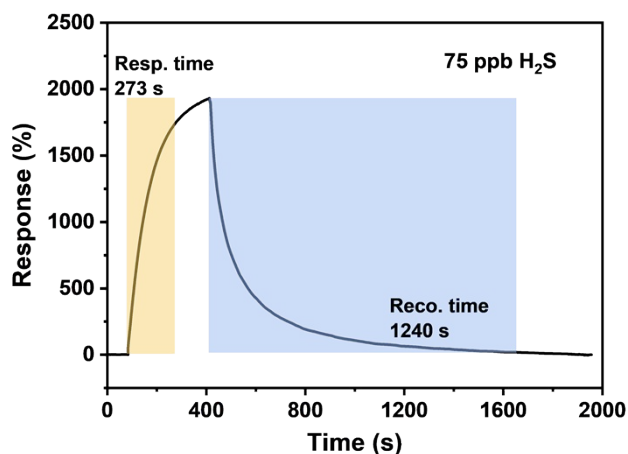

56

57 Fig. S11. Response/recovery times for the BS/BOI-2 sensor exposed to 75 ppb H<sub>2</sub>S.

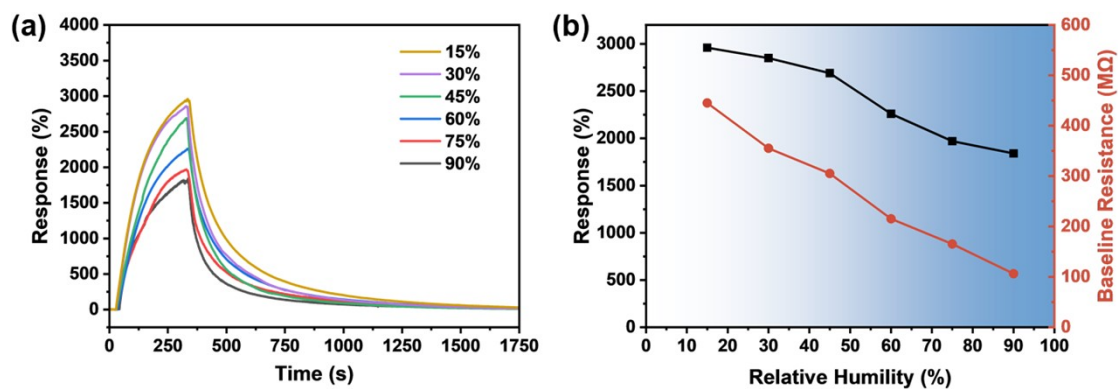

58

59 Fig. S12. (a) The response curves and (b) baseline resistance and sensing response of  
 60 the BS/BOI-2 sensor to 125 ppb H<sub>2</sub>S under different relative humidity conditions (15-  
 61 90%).

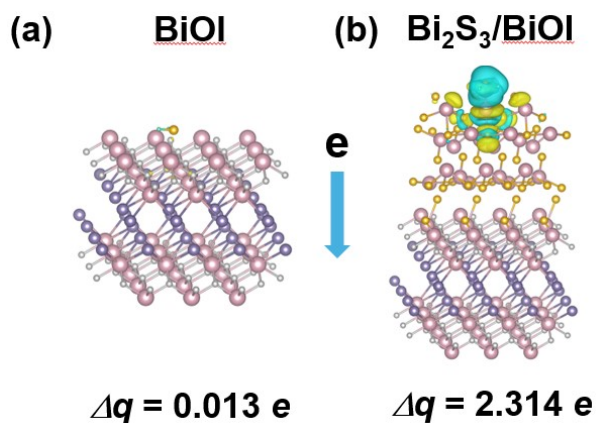

62

63 Fig. S13. Bader charge and differential charge density analysis of H<sub>2</sub>S on pristine BiOI  
 64 and the Bi<sub>2</sub>S<sub>3</sub>/BiOI heterostructure.

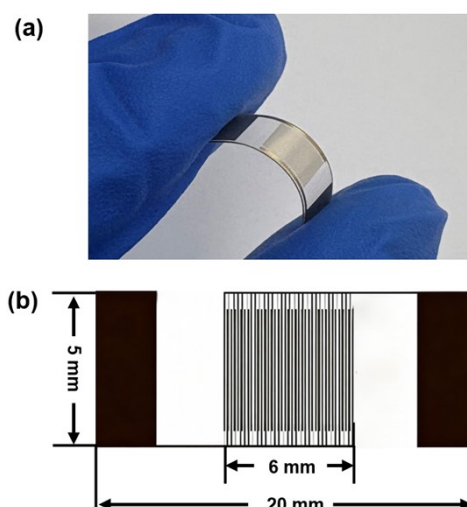

65

66 Fig. S14. Optical image (a) and schematic diagram (b) of the flexible electrode.

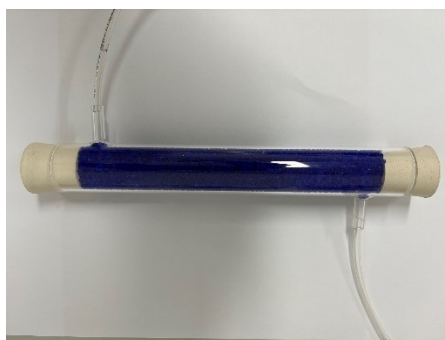

67

68 Fig. S15. Photographic image of the dehumidification apparatus.

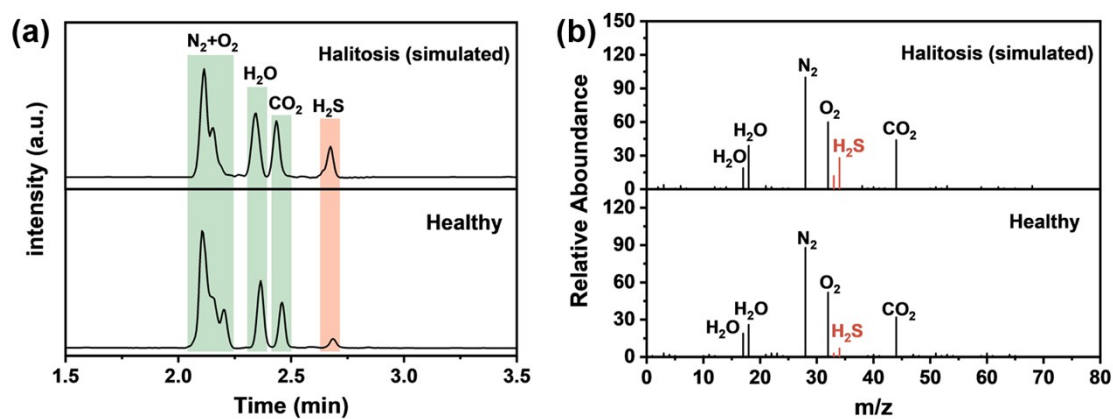

69

70 Fig. S16. GC chromatograms (a) and the corresponding mass spectra (b) of simulated  
71 halitosis breath and healthy breath samples.

72

73

74 Table S1. Hall effect measurement results of BiOI, BS/BOI-2, and Bi<sub>2</sub>S<sub>3</sub>

| Sample                         | Type | Carrier concentration (cm <sup>-3</sup> ) | Mobility (cm <sup>2</sup> V <sup>-1</sup> s <sup>-1</sup> ) | Conductivity (S·cm <sup>-1</sup> ) |
|--------------------------------|------|-------------------------------------------|-------------------------------------------------------------|------------------------------------|
| BiOI                           | n    | 4.91×10 <sup>13</sup>                     | 0.08                                                        | 6.28×10 <sup>-7</sup>              |
| BS/BOI-2                       | n    | 2.42×10 <sup>14</sup>                     | 0.62                                                        | 2.40×10 <sup>-5</sup>              |
| Bi <sub>2</sub> S <sub>3</sub> | n    | 1.79×10 <sup>15</sup>                     | 1.38                                                        | 3.95×10 <sup>-4</sup>              |

75

76

77

78

79

---

## 80 **Supplementary Note 1: Calculation method for theoretical detection limit**

81 The theoretical detection limit (TDL) was calculated using a signal-to-noise ratio  
82  $> 3$  as the sensing criterion. First, we collected ten data points from the baseline  
83 response before H<sub>2</sub>S exposure. A fifth-order polynomial fitting was applied to  
84 determine the average response value, and the variance was calculated using equation  
85 (1), where  $y$  is the average response value and  $y_i$  is the collected response value.

$$86 \quad R_{x^2} = \sum (y_i - y)^2 \quad (1)$$

87 Next, the root means square noise ( $RMS_{\text{noise}}$ ) was calculated using equation  
88 (2), where  $N$  is the number of extracted data points.

$$89 \quad RMS_{\text{noise}} = \sqrt{\frac{R_{x^2}}{N}} \quad (2)$$

90 Finally, the theoretical TDL was determined by using equation (3) and the slope  
91 value was obtained from the linear concentration-response relationship

$$92 \quad TDL = 3 \frac{RMS_{\text{noise}}}{\text{slope}} \quad (3)$$
